# Supplementary material for: Assimilation of the AMSU-A radiances using the CESM (v2.1.0) and the DART (v9.11.13)/RTTOV (v12.3)
Source: Copernicus journal article supplement (doi:10.5194/gmd-2023-60), 2023-04-26
Supplement: Supplementary file [file gmd-2023-60-AC1-supplement.pdf]

## **Referee #1**

We sincerely appreciate your comments and concerns about this manuscript. Detailed responses to your comments are described below. In this response letter, to distinguish between the referee's comments and authors' responses, your original comments are presented in an Italic font with an underline.

*Review of "Assimilation of the AMSU-A radiances using the CESM (v2.1.0) and the DART (v9.11.13)/RTTOV (v12.3)" by Young-Chan Noh et al.*

*This paper develops and evaluates pre-processing modules for the assimilation of AMSU-A microwave observations from low-earth-orbiting satellites. The authors developed quality control and bias correction and validated their approach by data-denial experiments. They assess forecast impact by comparing the (6-h forecast) first-guess departures between experiments. Results show that the RMSE of 6-h forecasts is reduced compared to radiosonde observations and ERA5 as reference.*

*I want to thank the authors for their valuable contribution as it allows the assimilation of AMSU-A observations for reanalysis and weather forecast. I found this manuscript very interesting, however, I think some issues need to be addressed before publication.*

### **Major comments**

*Please write in the introduction how your work relates to previous research on microwave and/or AMSU-A radiance assimilation. Readers should be made aware of relevant previous microwave assimilation studies if available.*

[Reply]

Thank you for your comment. I agree with your opinion. We modify the introduction part as follows:  
[Old, lines 76-79]

“For this reason, we attempt to assimilate the radiances of the Advanced Microwave Sounding Unit-A (AMSU-A) temperature sounder within the DART data assimilation system coupled with the NCAR CESM. AMSU-A instruments are currently operating on board many low-earth-orbiting (LEO) satellite platforms, and thus a large amount of AMSU-A observation data is available for assimilation. In addition, as the microwave sounder observations are less sensitive to clouds than the infrared sounder observations, the data availability of AMSU-A is better than that of the infrared sounder. As the preprocessing modules (e.g., quality control, cloud detection, and spatial thinning) for AMSU-A observations are not provided in the DART package, they are developed in this study. In addition, the diagonal observation error covariance matrix is estimated using the method suggested by Desroziers et al. (2005), and the bias correction scheme is also developed based on the methods suggested by Harris and Kelly (2001).”

[New]

“For this reason, we attempt to assimilate the radiances of the Advanced Microwave Sounding Unit-A (AMSU-A) temperature sounder within the DART data assimilation system coupled with the NCAR CESM. AMSU-A instruments are currently operating on board many low-earth-orbiting (LEO) satellite platforms, and thus a large amount of AMSU-A observation data is available for assimilation. In addition, as the microwave sounder observations are less sensitive to clouds than the infrared sounder observations, the data availability of AMSU-A is better than that of the infrared sounder. AMSU-A observations are actively used to improve global/regional forecasts as well as severe weather forecasts

such as tropical cyclones (Zhang et al., 2013; Zhu et al., 2016; Migliorini and Candy, 2019; Duncan et al., 2022). As the preprocessing modules (e.g., quality control, cloud detection, and spatial thinning) for AMSU-A observations are not provided in the DART package, they are developed in this study. In addition, the diagonal observation error covariance matrix is estimated using the method suggested by Desroziers et al. (2005), and a bias correction scheme is also developed based on the methods suggested by Harris and Kelly (2001). In this study, we attempt to assimilate the AMSU-A radiances in clear-sky conditions. In many operational NWP centers, the AMSU-A radiances have been assimilated in all-sky conditions (i.e., clear-sky and cloudy-sky) (Zhu et al., 2016; Migliorini and Candy, 2019; Duncan et al., 2022). However, as the current version of DART is not ready to assimilate the AMSU-A radiances in cloudy-sky conditions, only the clear-sky assimilation of AMSU-A radiances is considered.”

Duncan, D. I., Bormann, N., Geer, A. J., and Weston, P.: Assimilation of AMSU-A in All-Sky Conditions, *Mon. Weather Rev.*, 150, 1023-1041, doi: 10.1175/MWR-D-21-0273.1, 2022.

Migliorini, S. and Candy, B.: All-sky satellite data assimilation of microwave temperature sounding channels at the Met Office, *Q. J. Roy. Meteor. Soc.*, 145, 867–883, <https://doi.org/10.1002/qj.3470>, 2019.

Zhang, M., Zupanski, M., Kim, M.-J., and Knaff, J. A.: Assimilating AMSU-A Radiances in the TC Core Area with NOAA Operational HWRF (2011) and a Hybrid Data Assimilation System: Danielle (2010), *Mon. Weather Rev.*, 141, 3889–2907, <https://doi.org/10.1175/MWR-D-12-00340.1>, 2013.

Zhu, Y., Liu, E., Mahajan, R., Thomas, C., Groff, D., Delst, P. V., Collard, A., Kleist, D., Treadon, R., and Derber, J. C.: All-Sky Microwave Radiance Assimilation in NCEP's GSI Analysis System, *Mon. Weather Rev.*, 144, 4709–4735, <https://doi.org/10.1175/mwr-d-15-0445.1>, 2016.

*If available, how do your results compare to results of other data-denial studies assimilating AMSU-A? Did you find any similar studies you can compare your results to? Are they similar or different in any ways? You could comment on that in the summary.*

[Reply]

The AMSU-A radiances are already operationally assimilated at the many operational NWP centers such as the ECMWF, Met Office, and KMA. In particular, the AMSU-A instrument is one of three instruments comprising the Advanced TIROS Operational Vertical Sounder (ATOVS). Other two instruments are the High Resolution Infrared Sounder (HIRS) and the Microwave Humidity Sounder (MHS). Most global NWP centers conducted data-denial studies in which the ATOVS data were assimilated or rejected, instead of solely assimilating the AMSU-A radiances (English et al., 2000; Bormann et al., 2008). Thus, it is difficult to compare the results of this study with the previous data-denial studies conducted by the operational NWP centers.

However, there are two previous studies related to the assimilation of AMSU-A radiances into the global NWP system. First, Terasaki and Miyoshi (2017) attempted to assimilate the AMSU-A radiances into the non-hydrostatic icosahedral atmospheric model (NICAM)-based local ensemble transform Kalman filter (LETKF), resulting in the significant improvement of the analysis field. Second, Yamazaki et al. (2023) assessed the assimilation impact of AMSU-A observations using two diagnostic techniques which are ensemble-based forecast sensitivity to observations (EFSO) and observing system experiments (OSEs). As only three AMSU-A channels (channels 6, 7, and 8) were assimilated, it might be unfair to compare Yamazaki's results with our results. In addition, in Yamazaki et al. (2023), a single integrated skill score, called the observation impact (OI), was only used to diagnose the assimilation impact of AMSU-A observations. Nevertheless, Yamazaki et al. (2023) demonstrated that assimilating

AMSU-A observations contribute to improving the analysis quality. Thus, considering the overall context, instead of mentioning Yamazaki's study in the summary, it seems to be better to mention it in the result section where the analysis impacts are mentioned. We revised these sentences as follow:

[Old, lines 441-444]

“However, the global-mean STDDEV of 500 hPa geopotential height for the AMSU-A run is reduced to about 42 m as compared with the STDDEV (about 49 m) for the CNTL run, meaning that the 500 hPa geopotential height predictions are improved by assimilating the AMSU-A observations (Table 2). In particular, the error is significantly reduced over the Northern Hemisphere.”

[New]

However, the global-mean STDDEV of 500 hPa geopotential height for the AMSU-A run is reduced to about 42 m as compared with the STDDEV (about 49 m) for the CNTL run, meaning that the 500 hPa geopotential height predictions are improved by assimilating the AMSU-A observations (Table 2). In particular, the error is largely reduced over the Northern Hemisphere. That is, the analysis impact is more significant in the Northern Hemisphere. It is inconsistent with the consensus that the assimilation impact of satellite observations is larger in the Southern Hemisphere, where the conventional data are sparse (Terasaki and Miyoshi, 2017; Yamazaki et al., 2023).

Bormann, N., Kobayashi, S., Matricardi, M., McNally, A., Krzeminski, B., Thépaut, J.-N., and Bauer, P.: Recent developments in the use of ATOVS data at ECMWF. In Proceedings of the 16th International TOVS Study Conference, Angra dos Reis, Brazil. CIMSS, Univ. Wisconsin: Madison, USA, 2008.

English, S., Renshaw, R., Dibben, P., Smith, A., Rayer, P., Poulsen, C., Saunders, F., and Eyre, J.: A comparison of the impact of TOVS arid ATOVS satellite sounding data on the accuracy of numerical weather forecasts, Q. J. Roy. Meteor. Soc., 126, 2911–2931, 2000.

Terasaki, K. and Miyoshi, T.: Assimilating AMSU-A Radiances with the NICAM-LETKF, J. Meteorol. Soc. Jpn., 95, 433–446, <https://doi.org/10.2151/jmsj.2017-028>, 2017.

Yamazaki, A., Terasaki, K., Miyoshi, T., and Noguchi, S.: Estimation of AMSU-A radiance observation impacts in an LETKF-based atmospheric global data assimilation system: Comparison with EFSO and observing system experiments, Weather and Forecasting, 38, doi:10.1175/WAF-D-22-0159.1 2023.

*You abbreviate the standard deviation of the first-guess departure as STDDEV. I find this abbreviation very misleading and think that RMSE (or similar) would fit better, since STDDEV refers to standard-deviation and the standard-deviation of the forecast is the spread. So when I read your paper the first time, I thought that you show the reduction in spread. But with your definition STDDEV is the RMS difference (error) of observation minus background. Replacing the abbreviation STDDEV with RMSE (or similar) would be more clear.*

[Reply]

Thank you for your comment. Root-mean-square error (RMSE) and standard deviation (STDDEV) have similar formulas. However, two values are not the same. The STDDEV is used to measure the spread of data from the mean value. In contrast, the RMSE represents the spread between different two data (i.e., observation and background in this study). Thus, the RMSE includes the mean bias between the two data as well as the spread. In section 7.1, the STDDEV of first-guess departure was computed in order to remove the mean bias and only measure the background (i.e., 6-h forecast) error spread against the observation, as follows:

$$STDDEV_{OmB} = \sqrt{\frac{1}{N} \sum_{i=1}^N (OmB_i - \overline{OmB})^2}$$

$$RMSE_{OmB} = \sqrt{\frac{1}{N} \sum_{i=1}^N (OmB_i)^2}$$

Thus, it is better to keep the abbreviation of standard deviation to correctly describe the error values in section 7.1.

*L516: “in the tropics, the analysis impact is relatively small due to small model errors”. Option A: I guess you mean “smaller background error” (see minor comment L462). If you refer to the RMSE being smaller in the tropics, then I suggest a change of “model errors” to e.g. “background errors” or “first-guess departures”. Option B: If you really want to say “model error” then I don’t see from what result you conclude this. Please provide reasoning, evidence or rephrase (e.g. “presumably due to”) or tell the reader where it can be seen from (e.g. figure x). Why is the numerical model better in the tropics than at 60-90° S. I would rather guess that you get more analysis impact due to larger first-guess departures (option A) due to baroclinic waves?*

[Reply]

First, it seems to make you confused to mention the word “model error” in the summary. Considering that the background is also a short-term forecast (6-h) derived at the previous analysis cycle, it is better to replace “the model errors” with “forecast errors” as follows:

[Old, line 516]

“However, in the tropics, the analysis impact is relatively small due to the small model errors.”

[New]

“However, in the tropics, the analysis impact is relatively small due to the small forecast errors.”

[Reply]

This conclusion comes from Figure 8 and Figure 10. As shown in Figure 8, the analysis impact in the tropics is relatively smaller than that over the extratropics. It is also noted that the analysis error (about 14 m) is also quite small in the tropics as compared with the analysis errors in the extratropics (i.e., about 49 m and 63 m in the Northern Hemisphere and Southern Hemisphere, respectively). As the forecast evolves from the analysis over time, a large analysis error leads to a large forecast error and vice versa. Considering that the model background error covariance matrix is derived from the short-term ensemble forecasts, we expect that the background error covariance is also small in the tropics where the analysis error is small. Thus, the AMSU-A radiances are conservatively assimilated in the tropics as compared with the extratropics where the analysis errors are large. In addition, following Judt (2020), it was demonstrated that the predictability in the tropics is longer than in the middle-latitudes and polar regions because the equatorial waves are described well in the numerical model compared to baroclinic disturbances in the middle-latitude regions. We revised some sentences as follows:

[Old, lines 445-449]

“In the tropics, the analysis error (about 14 m) is quite small for the CNTL run, as compared with the large errors of about 48 m and 63 m in the Northern Hemisphere and Southern Hemisphere, respectively.

The small STDDEV over the tropics in the CNTL run (shown in Fig. 10a) suggests that the assimilation of the conventional data has brought the model ensembles into an agreement with the AMSU-A observations, so less improvement is there compared to the extratropics.”

[New]

“In the tropics, the analysis error (about 14 m) is quite small for the CNTL run, as compared with the large errors of about 48 m and 63 m in the Northern Hemisphere and Southern Hemisphere, respectively. Following Judt (2020), it was demonstrated that the tropical atmosphere has longer predictability than the extratropical atmosphere. Thus, the AMSU-A observations are conservatively assimilated in the tropics due to the small forecast errors, leading to less analysis impact.”

Judt, F.: Atmospheric predictability of the tropics, middle latitudes, and polar regions explored through global storm-resolving simulations, *J. Atmos. Sci.*, 77, 257–276, <https://doi.org/10.1175/JAS-D-19-0116.1>, 2020.

L515: You say that analysis errors in T, U, V were significantly reduced. You probably refer to figure 11, which shows “Normalized difference of the standard deviation”. Does it show the standard deviation of the forecast (i.e. ensemble spread?) or the standard deviation of the first-guess departure (i.e. the root-mean-square error of the forecast – observation)? Please be specific. Option A: If this is the ensemble spread, then it is not the error of the forecast, making your statement “analysis errors were reduced” to be wrong. You could say that “following the reduced ensemble spread, we expect a significant error reduction due to AMSU-A”. To measure the error of the forecast directly, it is necessary to compare to observations or independent analyses. Option B: If it is the RMS of forecast-observation, then replace “standard-deviation” with “RMSE of ... forecasts” or similar.

[Reply]

To assess the analysis impact of AMSU-A observations, in this study, the “ensemble-mean” analysis fields are verified against the ERA5 reanalysis. Using the departures between the DART ensemble-mean analysis and the ERA5 for four primary atmospheric variables (i.e., 500 hPa geopotential height, temperature, zonal wind, and meridional wind), two errors (i.e., bias and standard deviation) are computed. Thus, the bias and standard deviation of 500 hPa geopotential height are shown in Figure 8. And the normalized difference of standard deviation of other variables between the experimental run and control run is plotted in Figure 11. To prevent confusion, we revised some sentences as follow:

[Old, lines 404-408]

“For four primary atmospheric parameters (i.e., 500 hPa geopotential height, temperature, zonal wind, and meridional wind), the analysis errors are computed. In particular, the skill score of 500 hPa geopotential height is widely used as one of the key indicators to assess the overall performance of the model-derived output, because large-scale atmospheric motion in the middle troposphere (500 hPa) is closely linked with lower-level atmospheric motion.”

[New]

“For four primary atmospheric parameters (i.e., 500 hPa geopotential height, temperature, zonal wind, and meridional wind), the departures between the DART ensemble-mean analysis and the ERA5 are computed. Then bias and standard deviation are derived from the long-term departures. In particular, the error of 500 hPa geopotential height is widely used to assess the overall performance of the model-derived output, because large-scale atmospheric motion in the middle troposphere (500 hPa) is closely linked with lower-level atmospheric motion.”

L518: “the number of assimilated AMSU-A data is small “ ... “because the AMSU-A data are not

assimilated in the harsh condition of high latitude regions” Instead of saying “due to harsh conditions”, please provide a more scientific reason why observations are not assimilated. With information from L466, I would suggest to write e.g. “we rejected observations at latitudes >60° S because these observations degraded the analysis” or e.g. “due to detrimental effects of clouds and sea-ice”, if this is the case.

[Reply]

Thank you for your comment. To make this sentence clear, we revised this sentence as follows:

[Old, lines 516-519]

“Compared with the Northern Hemisphere, the number of assimilated AMSU-A data is small over the Southern Hemisphere, because the AMSU-A data are not assimilated in the harsh condition of high latitude regions (> 60°S) during the Southern Hemisphere winter season, resulting in a relatively small analysis impact over the Southern Hemisphere.”

[New]

“Compared with the Northern Hemisphere, less analysis impact in the Southern Hemisphere seems to be due to the reduction in the number of assimilated AMSU-A observations. The AMSU-A observations are rejected in the high latitude regions (> 60°S) during the Southern Hemisphere winter season, because assimilating these observations worsens the analysis quality.”

I could not open your EXP\_model\_outputs.egg and CNTL\_model\_outputs.egg in the zenodo repository. Could you please indicate how this filetype can be read?

[Reply]

I am sorry for making you inconvenient. As the model outputs were compressed in the rare file format “egg” which can be only decompressed with the ALZip software, it may not be easy to use this software. Thus, we re-uploaded these output files in the “tar” and “gzip” formats, the universal formats to compress/decompress the large-size files. Please, access this URL (<https://doi.org/10.5281/zenodo.7983459>) and download these model outputs in the Zenodo repository.

### Minor comments

L17: “ is obtained by assimilating the AMSU-A observations on top of the DART data assimilation system that already makes use of the conventional measurements” DART itself is a software and users decide on which observations to assimilate. Do you refer to a specific DART system which makes use of conventional observations? If it is your own system, then I suggest to remove “the DART assimilation system that makes use of” giving you: “... assimilating AMSU-A observations on top of conventional measurements” to avoid confusion

[Reply]

In this study, we used the version 9.11.13 of DART which is accessible via the DART data repository (<https://github.com/NCAR/DART>). In this version of DART, many types of conventional observations are able to be assimilated using the data-specific modules to convert the specific type of observation into the input format specified for the DART data assimilation system. In this study, we also used the original modules to assimilate the conventional observations without any modification in the DART package. To make this point clear, we revised this sentence as follows:

[Old, lines 52-53]

“In addition, well-defined modules are included to make various types of observations available in the

DART data assimilation process.”

[New]

“In addition, well-defined modules are included to make various types of observations available in the DART data assimilation process. Thus, DART can assimilate many observation types (e.g., conventional and satellite-based wind).”

L26: “With the advances in the observation/computation technique and the improved data assimilation methodology, the quality of the initial condition significantly increases” I suggest to rephrase, because it is not clear to me what the advance in observation /computation technique you refer to. Maybe you refer to increased amount of observations or satellite observations? What computation technique do you refer to? Parametrizations? An improved dynamical core?

[Reply]

Thank you for your comments. We clarified these sentences as follows:

[Old, lines 26-27]

“With the advances in the observation/computation technique and the improved data assimilation methodology, the quality of the initial condition significantly increases, which enhances the forecast skill.”

[New]

“With the huge amount of satellite observations and advances in model configurations (e.g., horizontal/vertical resolution, dynamic core) and data assimilation, the quality of the initial condition significantly increases, which enhances the forecast skill.”

L38: “However, researchers, who are not affiliated with the operational NWP centers, are restricted from accessing these data assimilation systems, because these operational NWP systems should be securely managed to provide global weather forecasting to the forecasters and users on time.” I agree that this is the case for many operational centers. However, I think you don’t need to explain why centers don’t share their system for research and I think it is not necessary for the reader. I suggest to remove or rephrase like “In our experience, researchers, who are not affiliated ...” or “Currently, ...” because this could change in the future. I also suggest you focus on the advantages of your setup e.g. by saying that your setup is freely available to everyone.

[Reply]

I agree with your suggestion. It is better to remove this sentence to prevent confusion.

[Old, lines 37-43]

“Operational NWP centers have well-constructed assimilation systems to use diverse types of available observations with up-to-date data assimilation schemes. However, researchers, who are not affiliated with the operational NWP centers, are restricted from accessing these data assimilation systems, because these operational NWP systems should be securely managed to provide global weather forecasting to the forecasters and users on time. In addition, as most operational global NWP systems are installed in high-performing computation systems due to the huge computation resources required, it is practically impossible to handle the operational NWP system under the computation environment in which sufficient computation resources are not provided.”

[New]

“Operational NWP centers have well-constructed assimilation systems to use diverse types of available observations with up-to-date data assimilation schemes. However, as most operational global NWP systems require huge computation resources, it is practically impossible for researchers to recreate those

systems outside of the NWP centers.”

L63-67: It seems you use Zhou et al. 2022 as a reason (“thus”) for why there is interest to assimilate satellite-observed radiances. Zhou et al. 2022 is an example for radiance assimilation using the same software (DART). I suggest rephrasing.

[Reply]

I partly agree with your interpretation of this paragraph. From our point of view, the aim of introducing Zhou’s paper in this paragraph is to highlight that the observed radiances of satellites are first assimilated into the DART system, compared with Zhou’s paper in which the simulated radiances, not observed, were assimilated into the DART system. Of course, we also considered mentioning Zhou’s paper in the previous paragraph that describes some previous DART assimilation studies in which other types of observations (i.e., GPSRO and wind profilers) were assimilated. But, it was contextually inappropriate to mention Zhou’s paper in the previous paragraph, because the satellite-related contents should be described in the next paragraph including the research motivation. For this reason, we decided to introduce Zhou’s paper in this paragraph to highlight the originality of our study. We modified this sentence as follow:

[Old, lines 65-67]

“Thus, it is of interest to assimilate the satellite-observed radiances using the DART data assimilation system, in order to know how the analysis derived from DART is affected by satellite observations.”

[New]

“Considering that, it is interesting to assimilate the satellite-observed radiances using the DART data assimilation system to know how the analysis derived from DART is affected by real satellite observations.”

L119: I suggest to provide a direct link to the dataset for easier replication. I assume it is <https://rda.ucar.edu/datasets/ds337.0/> ?

[Reply]

Thank you for your comment. We revised this sentence as follow:

[Old, lines 117-119]

“The baseline observation data are obtained from the National Centers for Environmental Prediction (NCEP) Automated Data Processing (ADP) global upper air and surface weather observations that are available from the NCAR Research Data Archive (NCAR RDA) (<https://rda.ucar.edu/>).”

[New]

“The baseline observation data are obtained from the National Centers for Environmental Prediction (NCEP) Automated Data Processing (ADP) global upper air and surface weather observations that are available from the NCAR Research Data Archive (NCAR RDA) (<https://rda.ucar.edu/datasets/ds337.0/>).”

L150: Is this “gross quality control” the same as the outlier threshold option in DART? Please clarify.

[Reply]

Yes, the “gross quality control” is the same as the outlier test in the quality control process embedded in the DART system. We replaced the “gross quality control” with the “outlier test” as follows:

[Old, lines 14-15]

“In the quality control, three sub-processes are included: gross quality control, channel selection, and



spatial thinning.”

[New]

“In the quality control, three sub-processes are included: outlier test, channel selection, and spatial thinning.”

[Old, lines 147-148]

“In the preprocessing, two main steps are included: quality control and bias correction. Quality control consists of three sub-processes: gross quality control, channel selection, and spatial thinning.”

[New]

“In the preprocessing, two main steps are included: quality control and bias correction. Quality control consists of three sub-processes: outlier test, channel selection, and spatial thinning.”

[Old, line 151]

“, the AMSU-A observation is not assimilated (called gross quality control).”

[New]

“, the AMSU-A observation is not assimilated (called outlier test).”

[Old, lines 505-507]

“To make the AMSU-A data available to be assimilated, preprocessing steps were developed, which include quality control (i.e., gross quality control, channel selection and spatial thinning) and bias correction (i.e., scan-bias correction and air-mass-bias correction)”

[New]

“To make the AMSU-A data available to be assimilated, preprocessing steps were developed, which include quality control (i.e., outlier test, channel selection and spatial thinning) and bias correction (i.e., scan-bias correction and air-mass-bias correction)”

L219: “Biases change with time” I suggest a change to “biases depend on time-of-day and on the season”. Change with time could mean that the biases are evolving, but the term “bias” usually means a constant (average), systematic error.

[Reply]

I agree with your suggestion. We modified this sentence as follows:

[Old, lines 219-220]

“The biases tend to change with time (diurnal or seasonal), the scan position of the instrument, and air mass.”

[New]

“The biases tend to depend on time-of-day and on the season as well as the instrument scan angle and air mass.”

Figure 8a and 9: Confidence intervals would be appreciated to see whether any differences are significant. I guess you could do bootstrapping or a test for the difference.

[Reply]

We overlaid 99% confidence intervals in Figures 8 and 9 as follows:

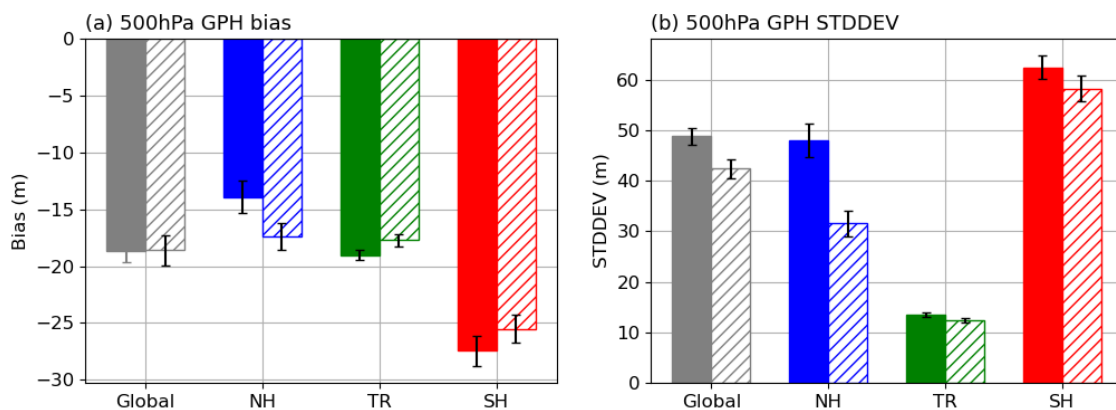

Figure 8. (a) Mean bias and (b) standard deviation (STDDEV) of 500 hPa geopotential height over the global (grey), Northern Hemisphere (NH; blue), tropics (TR; green), and Southern Hemisphere (SH; red). Filled and hatched bars indicate the results for the control (CNTL) and experiment (AMSU-A) run, respectively. The 99% confidence intervals are indicated by the vertical black lines.

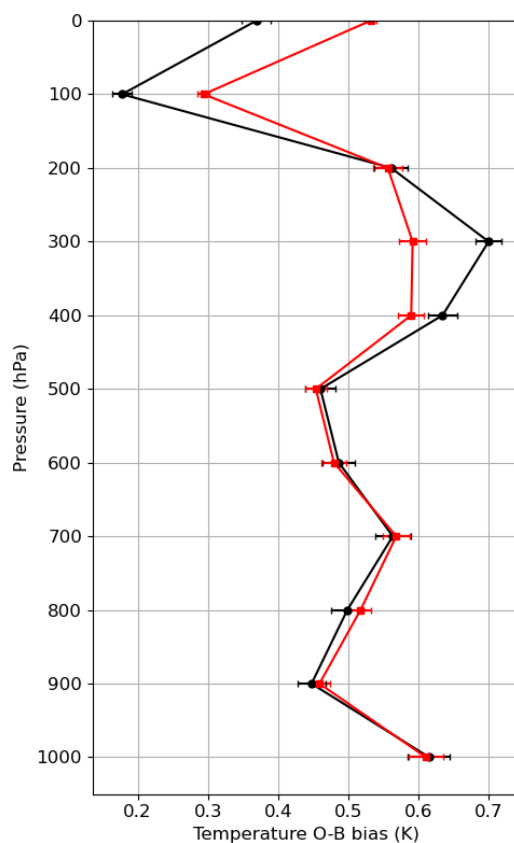

Figure 9. Mean bias of the first-guess departure for the radiosonde temperature measurements for the control (CNTL run; circle symbol and black line) and experiment (AMSU-A run; square symbol and red line) runs. Horizontal lines indicate 99% confidence intervals.

*Figure captions: instead of “,” please use “:”, e.g. “(global: grey, tropics: green, ...)*

[Reply]

Thank you for comment. We revised the captions of figures in the manuscript.

L352: What is a horizontal distribution? I suggest to remove “horizontal”.

[Reply]

We revised this sentence as follow:

[Old, lines 351-353]

“In addition to the reduction of localization half-width (compared to the default value of 0.15), the sampling error correction algorithm was applied, which uses pre-defined information about the horizontal distribution of the correlation between the model state variables and the observations as a function of ensemble size.”

[New]

“In addition to the reduction of localization half-width (compared to the default value of 0.15), the sampling error correction algorithm was applied, which uses pre-defined information about the correlation between the model state variables and the observations as a function of ensemble size.”

L361: It could be interesting to add information on whether you used the inflation method with a gaussian distribution (option 2) or the inverse gamma (option 5) for the inflation value.

[Reply]

We revised these sentences as follow:

[Old, lines 360-362]

“In DART, the ensemble spread varies spatiotemporally, as a function of the evolving observation network and the chosen inflation algorithm. These experiments use a spatiotemporally varying inflation algorithm.”

[New]

“In DART, the ensemble spread varies spatiotemporally, as a function of the evolving observation network and the chosen inflation algorithm. These experiments use a spatiotemporally varying inflation algorithm with a gaussian distribution.”

L405: “Skill score of 500 hPa GPH”. The term “skill score” is reserved for specific verification metrics. I suggest to remove “skill score” as it is not necessary or use “ we verify the 500-hPa geopotential height using first-guess departure mean and standard deviation.”

[Reply]

Thank you for your comment. To make it clear, we revised this sentence as follow:

[Old, lines 405-408]

“For four primary atmospheric parameters (i.e., 500 hPa geopotential height, temperature, zonal wind, and meridional wind), the analysis errors are computed. In particular, the skill score of 500 hPa geopotential height is widely used as one of the key indicators to assess the overall performance of the model-derived output, because large-scale atmospheric motion in the middle troposphere (500 hPa) is closely linked with lower-level atmospheric motion.”

[New]

“For four primary atmospheric parameters (i.e., 500 hPa geopotential height, temperature, zonal wind, and meridional wind), the departures between the DART ensemble-mean analysis and the ERA5 are computed. Then bias and standard deviation are derived from the long-term departures. In particular, the error of 500 hPa geopotential height is widely used to assess the overall performance of the model-

derived output, because large-scale atmospheric motion in the middle troposphere (500 hPa) is closely linked with lower-level atmospheric motion.”

*L459-460: “if both regions are extracted ... the assimilation impact is comparable” means just that if no observations are assimilated, we would not get an analysis impact. I would suggest to write instead what would happen if it would not be August/September, but February/March? Would we have a comparable/larger/smaller analysis impact compared to the analysis impact in the Northern Hemisphere in August?*

[Reply]

This sentence seems to make us misunderstand. As shown in Figure 10, the analysis errors for the AMSU-A run are significantly reduced in the mid-latitude region (i.e., 30°S-60°S and 30°N-60°N) in both hemispheres, compared with the control run. However, in the high-latitude region (i.e., 60°S-90°S and 60°N-90°N), the analysis impact of AMSU-A observations is only significant in the Northern Hemisphere, and neutral in the Southern Hemisphere. Thus, if the high latitude regions are not considered in the error computation, the analysis impact is still significant, but the gap in the analysis impact (shown in Table 2) between both hemispheres considerably decreases. To prevent confusion, we revised Table 2 and some sentences as follows:

[Old, line 431]

Table 2. Error statistics of 500 hPa geopotential height (m) for the control (CNTL run) and experiment (AMSU-A run) run. Better values are bolded.

| Trial Name | Bias          |               |               |               | STDDEV       |              |              |              |
|------------|---------------|---------------|---------------|---------------|--------------|--------------|--------------|--------------|
|            | Global        | NH            | TR            | SH            | Global       | NH           | TR           | SH           |
| CNTL       | -18.70        | <b>-13.90</b> | -19.05        | -27.45        | 48.82        | 48.02        | 13.55        | 62.54        |
| AMSU-A     | <b>-18.59</b> | -17.39        | <b>-17.73</b> | <b>-25.51</b> | <b>42.42</b> | <b>31.55</b> | <b>12.41</b> | <b>58.29</b> |

[New]

Table 2. Error statistics of 500 hPa geopotential height (m) for the control (CNTL run) and experiment (AMSU-A run) run. Better values are bolded. In parentheses, error statistics are shown over the mid-latitude region (30°S-60°S and 30°N-60°N) in the Northern and Southern Hemisphere.

| Trial Name | Bias          |                             |               |                                    | STDDEV       |                                  |              |                                  |
|------------|---------------|-----------------------------|---------------|------------------------------------|--------------|----------------------------------|--------------|----------------------------------|
|            | Global        | NH                          | TR            | SH                                 | Global       | NH                               | TR           | SH                               |
| CNTL       | -18.70        | <b>-13.90</b><br>(-18.43)   | -19.05        | -27.45<br>(-19.84)                 | 48.82        | 48.02<br>(26.71)                 | 13.55        | 62.54<br>(38.55)                 |
| AMSU-A     | <b>-18.59</b> | -17.39<br>( <b>-16.95</b> ) | <b>-17.73</b> | <b>-25.51</b><br>( <b>-19.54</b> ) | <b>42.42</b> | <b>31.55</b><br>( <b>20.24</b> ) | <b>12.41</b> | <b>58.29</b><br>( <b>33.49</b> ) |

[Old, lines 459-460]

“Thus, if the high-latitude regions (i.e., 60°S-90°S and 60°N-90°N) are extracted in the error computation over both hemispheres, the assimilation impact is comparable (not shown).”

[New]

“Thus, if the high-latitude regions (i.e., 60°S-90°S and 60°N-90°N) are extracted in the error computation over both hemispheres, the analysis impact is still significant, but the difference in the

analysis impact between both hemispheres considerably decreases.”

In addition, as you suggested, it is also interesting how the analysis impact pattern changes if the trial period is the winter season (January – February) in the Northern Hemisphere. Following Yamazaki et al. (2023), the analysis impact is quite similar for each winter season in the Northern Hemisphere (21 Dec 2018 – 31 Jan 2019) and Southern Hemisphere (23 August – 18 October 2019).

L462: “as the conventional observations are quite sparse in the high latitude region, the model errors are relatively larger than the other latitudinal regions” I suggest to use “forecast error” instead of “model error” if figure 10 shows the RMSE of the forecast. Model error specifically states that the model is wrong. Forecast error is more general and includes that missing observations lead to larger analysis error which then grow into large forecast errors. I guess the latter is the case.

[Reply]

As you mentioned, the analysis quality is less improved if a small number of observations are assimilated, leading to the degradation of the short-term forecast quality which is used as the background for the next assimilation cycle. This assimilation circulation is continuously accumulated in the high latitude region where the conventional observations are rare, resulting in the overall reduction of the model performance (i.e., forecast error). Thus, considering this context, it is suitable to use the “forecast error” instead of the “model error” in this sentence as follow:

[Old, lines 462-464]

“In particular, as the conventional observations are quite sparse in the high latitude region, the model errors are relatively larger than the other latitudinal regions (i.e., the tropics and mid-latitude region, shown in Fig. 10a).”

[New]

“In particular, as the conventional observations are quite sparse in the high latitude region, the forecast errors are relatively larger than the other latitudinal regions (i.e., the tropics and mid-latitude region, shown in Fig. 10a).”

L466: From figure 2, I see that the rejected observations coincide with the presence of sea-ice? What do you think? Maybe you can comment on that?

[Reply]

As mentioned in section 4.1., three tropospheric channels (channels 5–7) are not assimilated over the land and sea-ice, because the surface information (e.g., surface temperature and surface spectral emissivity) is uncertain. Thus, in the channel selection step, the cloud liquid water (CLW) and sea-ice index (SII) are retrieved using two retrieval algorithms suggested by Grody et al. (2001) and Grody et al. (1999), respectively. That is, if the CLW is larger than 0.2 mm or the SII is larger than 0.1, three tropospheric channels (channels 5–7) are rejected. For this reason, a large number of rejected AMSU-A observations (shown in Fig. 2c) are shown over sea-ice areas (shown in Fig. 2b) near the north and south poles. This point was described as follows:

[Old, lines 183-190]

“In this study, seven candidate AMSU-A channels (i.e., channels 5–11) are assimilated differently, depending on the surface type. Channels 5, 6, and 7 are the main tropospheric channels. Their weighting functions peak below 200 hPa, but also have a bit of sensitivity to the surface because of the broad vertical shape of the weighting functions. Thus, the quality of the analysis can be degraded by assimilating the three tropospheric channels over the land and sea-ice types whose surface information

(e.g., surface temperature and surface spectral emissivity) is uncertain. For this reason, AMSU-A channels 5–7 are not assimilated over the land and sea ice. To identify sea-ice area, the sea-ice index (SII) is retrieved from observations of AMSU-A channels 1 and 3 over the high latitude region (poleward of 50 degrees), using the retrieval algorithm suggested by Grody et al. (1999).”

L467: You write that observations from latitudes >60° S were rejected, but figure 2 shows also observations from >60°S at 180° longitude. Did you really exclude all observation latitude > 60°S or is it related to something else? e.g. an outlier threshold, or due to mostly cloud-affected observations with large CLW, sea-ice?

[Reply]

Figure 2 aims to show how many AMSU-A observations are rejected if the cloud and sea-ice detection algorithms are applied in the channel selection step. After the cloud and sea-ice detection, the AMSU-A observations in the high latitude region (> 60°S) are rejected to prevent the analysis degradation. That is, these two steps (i.e., cloud/sea ice detection and the high-latitude rejection) are independently/sequentially proceeded. Figure 2a and 2b is the results of cloud and sea-ice detection, respectively. Finally, Figure 3c shows the spatial distribution of AMSU-A observations passed or rejected by two detections.

L474: It is not clear to me whether ERA5 or radiosondes were used to produce figure 11.

[Reply]

In Figure 11, the standard deviations of temperature and two wind (i.e., zonal and meridional winds) are computed against the ERA5 reanalysis. We mentioned the error computation of four primary variables in section 7.2 as follows:

[Old, lines 400-405]

“To assess the impact of the AMSU-A observations on the analysis derived from the DART data assimilation system, the analysis errors are computed between the DART analysis and the European Centre for Medium-Range Weather Forecasts (ECMWF) reanalysis version 5 (ERA5) as the reference data. As the ERA5 is made through the assimilation of all available observation data in the ECMWF data assimilation system and provides consistent maps without spatial gaps, the ERA5 is employed to assess the model-derived output. For four primary atmospheric parameters (i.e., 500 hPa geopotential height, temperature, zonal wind, and meridional wind), the analysis errors are computed.”

[New]

“To assess the impact of the AMSU-A observations on the analysis derived from the DART data assimilation system, the analysis errors are computed between the DART analysis and the European Centre for Medium-Range Weather Forecasts (ECMWF) reanalysis version 5 (ERA5) as the reference data. As the ERA5 is made through the assimilation of all available observation data in the ECMWF data assimilation system and provides consistent maps without spatial gaps, the ERA5 is employed to assess the model-derived output. For four primary atmospheric parameters (i.e., 500 hPa geopotential height, temperature, zonal wind, and meridional wind), the departures between the DART ensemble-mean analysis and the ERA5 are computed. Then bias and standard deviation are derived from the long-term departures.”

Table 2: Is it possible to indicate which values are statistically significant? Or are they all significant?

[Reply]

Using the error values described in Table 2, Figures 8a and 8b are made. We found that all values are statistically significant. In the updated Figure 8, we overlaid 99% significance intervals as follows:

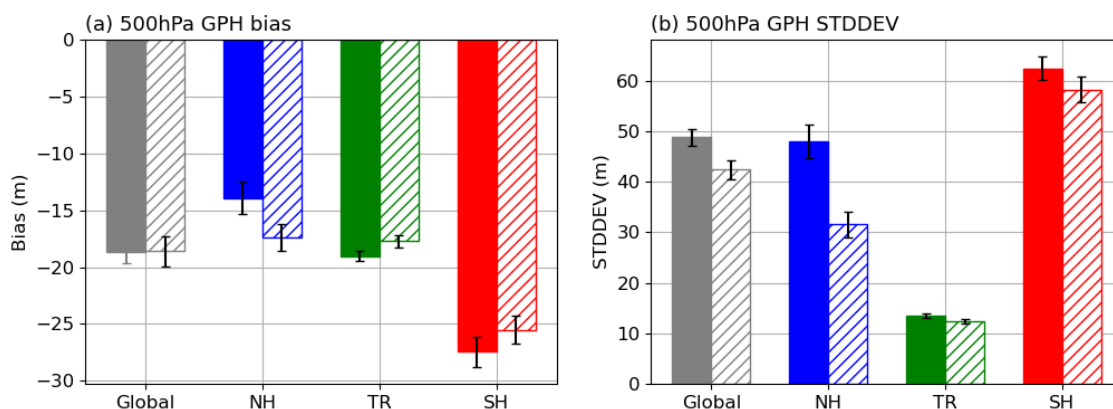

Figure 8. (a) Mean bias and (b) standard deviation (STDDEV) of 500 hPa geopotential height over the global (grey), Northern Hemisphere (NH; blue), tropics (TR; green), and Southern Hemisphere (SH; red). Filled and hatched bars indicate the results for the control (CNTL) and experiment (AMSU-A) run, respectively. The 99% confidence intervals are indicated by the vertical black lines.

Code and data availability: What does a potential user of your pre-processing modules have to do in order to use your modules? Do they have to download your code from zenodo or will the modules be integrated into DART? Maybe you can provide a “recipe” of which steps are necessary?

[Reply]

If a potential user would like to assimilate the AMSU-A radiances into the DART system downloaded from the DART data repository (<https://github.com/NCAR/DART>), the user has to download some codes in the dataset (named “data\_processing\_codes.zip”) uploaded in the Zenodo repository (<https://doi.org/10.5281/zenodo.7714755>). It is because the preprocessing steps are developed in this study, which are not provided in the original DART package. And then, these codes are needed to be integrated into the DART system. As we also uploaded the DART package (name “DART.zip”) which was used in this study, a potential user can construct the AMSU-A radiance data assimilation system by referring to the code structure in our DART package. Hopefully, in near future, the preprocessing modules will be integrated into DART through close collaboration with NCAR.

Figure 8, 10, 11: I guess these figures use ERA5 data? Please add the data source for which reference data has been used in the caption e.g. ERA5 reanalysis or observations.

[Reply]

Thank you for your comment. We revised these captions as follows:

[Old, lines 418-420]

“Figure 8. (a) Mean bias and (b) standard deviation (STDDEV) of 500 hPa geopotential height over the global (grey), Northern Hemisphere (NH; blue), tropics (TR; green), and Southern Hemisphere (SH; red). Filled and hatched bars indicate the results for the control (CNTL) and experiment (AMSU-A) run, respectively.”

[New]

“Figure 8. (a) Mean bias and (b) standard deviation (STDDEV) of 500 hPa geopotential height over the

global (grey), Northern Hemisphere (NH; blue), tropics (TR; green), and Southern Hemisphere (SH; red), derived against the ERA5 reanalysis. Filled and hatched bars indicate the results for the control (CNTL) and experiment (AMSU-A) run, respectively.”

[Old, lines 471-472]

“Spatial distribution of the standard deviation (STDDEV) of the 500 hPa geopotential height for the (a) control run (CNTL) and (b) experiment (AMSU-A) runs.”

[New]

“Spatial distribution of the standard deviation (STDDEV) of the 500 hPa geopotential height for the (a) control run (CNTL) and (b) experiment (AMSU-A) runs, derived against the ERA5 reanalysis.”

[Old, lines 500-502]

“Figure 11. Normalized difference of the standard deviation (STDDEV) of (a) temperature, (b) zonal wind, and (c) meridional wind between the experiment (AMSU-A) run and the control (CNTL) run. Colors indicate the latitude regions (global; grey, Northern Hemisphere; blue, tropics; green, and Southern Hemisphere; red). Horizontal bars indicate 99% confidence intervals.”

[New]

“Figure 11. Normalized difference of the standard deviation (STDDEV) of (a) temperature, (b) zonal wind, and (c) meridional wind between the experiment (AMSU-A) run and the control (CNTL) run, derived against the ERA5 reanalysis. Hatched colors indicate the latitude regions (global; grey, Northern Hemisphere; blue, tropics; green, and Southern Hemisphere; red). Horizontal lines indicate 99% confidence intervals.”
